# Supplementary material for: Analysis of Lung Adenocarcinoma Subtypes Based on Immune Signatures Identifies Clinical Implications for Cancer Therapy
Source: PubMed Central journal article supplement (PMC7183104; doi:10.1016/j.omto.2020.03.021), 2020-04-07
Supplement: mmc1.pdf [file mmc1.pdf]

**OMTO, Volume 17**

**Supplemental Information**

**Analysis of Lung Adenocarcinoma Subtypes**

**Based on Immune Signatures Identifies**

**Clinical Implications for Cancer Therapy**

**Feng Xu, Jie-xin Chen, Xiong-bin Yang, Xin-bin Hong, Zi-xiong Li, Ling Lin, and Yong-song Chen**

**Supplemental Figure 1 Hierarchical clustering of LUAD patients.**

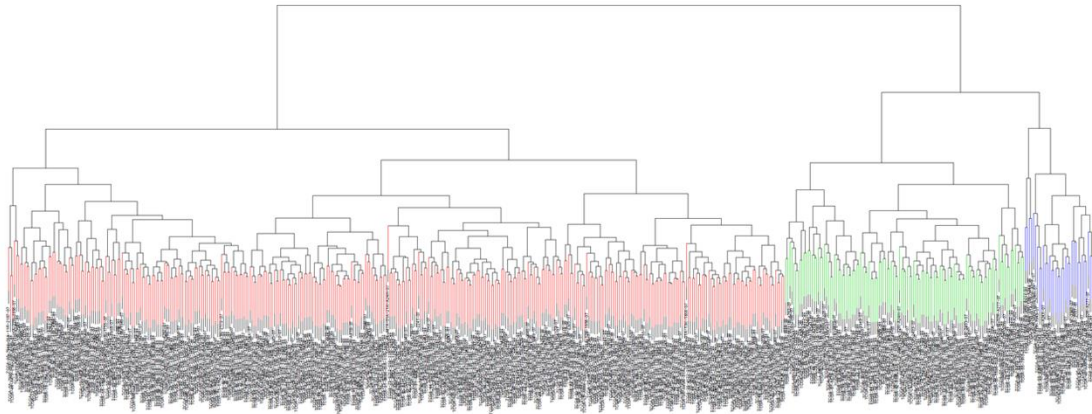

**Supplemental Figure 2 Stemness indices in LUAD subtypes.**

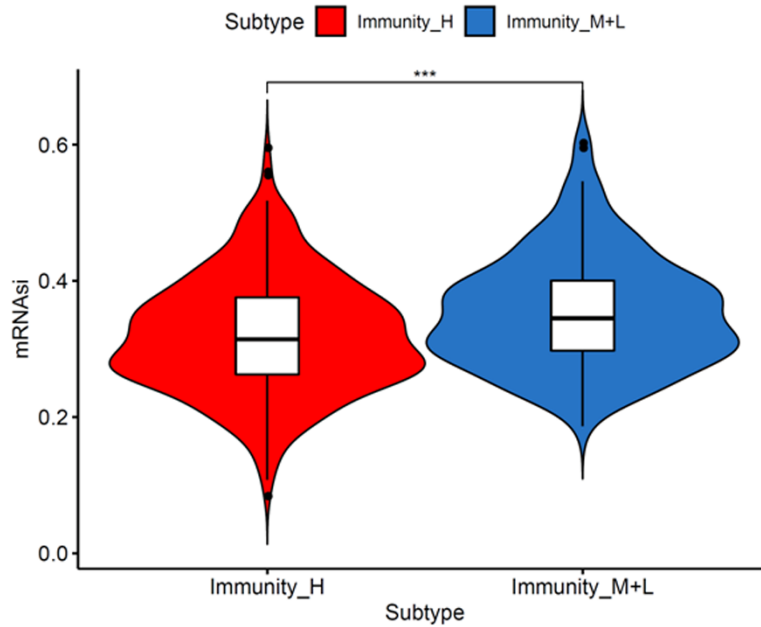

**Supplemental Figure 3 Relationship between the immune signature model and the clinical information.** (A) Nomogram for predicting the probability of 1-, 3-, and 5-year overall survival for LUAD patients.; (B) Time-dependent ROC curve analyses of the immune signature model, gender, TNM stage, T stage, N stage, M stage.

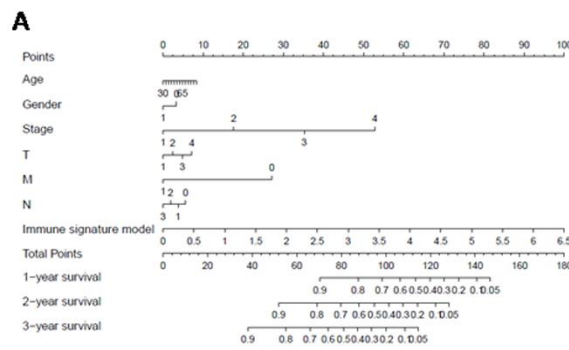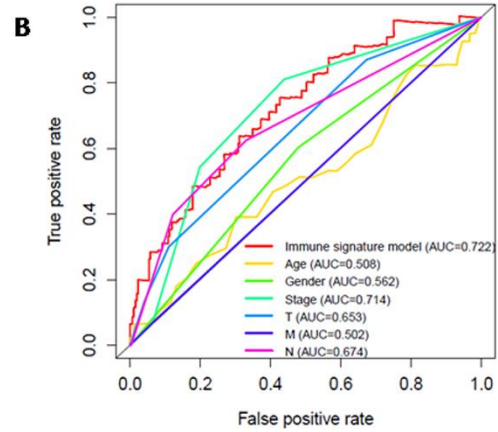

**Supplemental table 1 chemotherapeutic response**

| GDSC name    | p        | Synonyms                                                     | Targets                             | Target way                        |
|--------------|----------|--------------------------------------------------------------|-------------------------------------|-----------------------------------|
| CI.1040      | 2.04E-23 | CI 1040, PD-18435, PD-184352, 212631-79-3                    | MEK1, MEK2                          | ERK MAPK signaling                |
| AZD7762      | 4.84E-23 | AZD-7762, AZD 7762                                           | CHEK1, CHEK2                        | Cell cycle                        |
| LFM.A13      | 3.93E-22 | DDE-28                                                       | BTK                                 | Other, kinases                    |
| DMOG         | 4.53E-20 | Dimethyloxalylglycine                                        | HIF-PH                              | Metabolism                        |
| BMS.536924   | 1.22E-18 | BMS 536924                                                   | IGF1R, IR                           | IGF1R signaling                   |
| AZD6244      | 1.98E-18 | AZD6244, AZD-6244, ARRY-886, Selumetinib                     | MEK1, MEK2                          | ERK MAPK signaling                |
| RDEA119      | 2.01E-18 | RDEA119, BAY-86-9766, BAY 869766                             | MEK1, MEK2                          | ERK MAPK signaling                |
| BMS.754807   | 2.17E-17 | BMS754807, BMS 754807                                        | IGF1R, IR                           | RTK signaling                     |
| CEP.701      | 2.55E-17 | CEP-701, SP-924, SPM-924, A-154475, KT-555, Lestaurtinib     | FLT3, JAK2, NTRK1, NTRK2, NTRK3     | Other, kinases                    |
| Sunitinib    | 3.45E-17 | Sutent, Sunitinib Malate, SU-11248                           | PDGFR, KIT, VEGFR, FLT3, RET, CSF1R | RTK signaling                     |
| Methotrexate | 4.41E-15 | Abitrexate, Amethopterin, Rheumatrex, Trexall, Folex         | Antimetabolite                      | DNA replication                   |
| CGP.60474    | 6.33E-15 | KIN001-019, CGP60474, CGP 60474                              | CDK1,CDK2,CDK5,CDK7,CDK9, PKC       | Cell cycle                        |
| AS601245     | 2.89E-13 | /                                                            | JNK1, JNK2, JNK2                    | JNK and p38 signaling             |
| AICAR        | 3.81E-13 | AICAR, N1-(b-D-Ribofuranosyl)-5-aminoimidazole-4-carboxamide | AMPK agonist                        | Metabolism                        |
| Camptothecin | 8.97E-13 | Camptothecine, (+)-Camptothecin                              | TOP1                                | DNA replication                   |
| Roscovitine  | 1.69E-12 | Roscovitine, CYC-202, AL-39256                               | CDK2, CDK7, CDK9                    | Cell cycle                        |
| NVP.TAE684   | 2.05E-12 | NVP-TAE 684, TAE684, TAE-684                                 | ALK                                 | RTK signaling                     |
| RO.3306      | 7.05E-12 | /                                                            | CDK1                                | Cell cycle                        |
| Cisplatin    | 1.27E-11 | cis-Diammineplatinum(II) dichloride, Platinol, CIS-DDP       | DNA crosslinker                     | DNA replication                   |
| MG.132       | 1.27E-11 | LLL cpd, MG 132, MG132                                       | Proteasome, CAPN1                   | Protein stability and degradation |
